# Supplementary material for: Sub-Cellular Dynamic Analysis of BGC823 Cells after Treatment with the Multi-Component Drug CKI Using Raman Spectroscopy
Source: MDPI journal article supplement (doi:10.3390/ijms241612750), 2023-08-13
Supplement: s1 [file s1]

## Supporting Information

**Table S1.** Assignments of Raman bands in spectra for cells <sup>[1-8]</sup>.

| Raman peaks<br>(cm <sup>-1</sup> ) | Components                           |                                       |                                                     |                              |
|------------------------------------|--------------------------------------|---------------------------------------|-----------------------------------------------------|------------------------------|
|                                    | Nucleic acid                         | Proteins                              | Lipids                                              | Carbohydrates                |
| 792                                | DNA (v(OPO)backbone)                 |                                       |                                                     |                              |
| 780-805                            | C,T,U (v(CC)ring)                    |                                       |                                                     |                              |
| 843                                | Phosphodiester vs(O–P–O)             |                                       |                                                     |                              |
| 941                                | RNA/ribose (v(CC)ring)               |                                       |                                                     |                              |
| 1003                               |                                      | Phe (vs(CC)ring)                      |                                                     |                              |
| 1030                               |                                      | Phe                                   | v(CC),phospholipids                                 | (δ(CH))v(CC), v(CO), v(C–OH) |
| 1077                               | v(PO <sub>2</sub> <sup>-</sup> )     |                                       |                                                     |                              |
| 1092                               | DNA v(PO <sub>2</sub> <sup>-</sup> ) |                                       |                                                     |                              |
| 1122                               |                                      | v(C–N) v(C–C)                         | v(C–N) v(C–C)                                       |                              |
| 1199                               | v(PO <sub>2</sub> <sup>-</sup> )     | v(C–N)                                |                                                     |                              |
| 1252                               |                                      | v(C–N)                                |                                                     |                              |
| 1296                               |                                      | amide III (δ(NH), v(CN))              |                                                     |                              |
| 1313                               |                                      |                                       | t(CH <sub>3</sub> CH <sub>2</sub> )                 |                              |
| 1334                               |                                      | ω(CH <sub>3</sub> /CH <sub>2</sub> )  |                                                     |                              |
| 1375                               | A,G,T (v(CC)ring)                    | glycoproteins (δ(CH <sub>3</sub> ))   | lipids/acyl chains (δ(CH <sub>3</sub> ))            | saccharides                  |
| 1446                               |                                      |                                       | lipid denaturation                                  |                              |
| 1436                               |                                      | δ(CH <sub>2</sub> , CH <sub>3</sub> ) | δ(CH <sub>2</sub> , CH <sub>3</sub> ) in acyl chain |                              |
| 1579                               | Guanine; adenine                     |                                       |                                                     |                              |
| 1660                               |                                      | AmideI(v(C=O))/α-helix                | v(C=C)                                              |                              |
| 1720-1750                          |                                      |                                       | v(C=O)in ester COOR                                 |                              |

Abbreviation: A-adenine; G-guanine; Glu- glucose; Phe- phenylalanine; δ- in-plane deformation; γ - out-of-plane deformation; v- stretching; ρ -rocking; t- twisting; u- wagging. s- symmetric

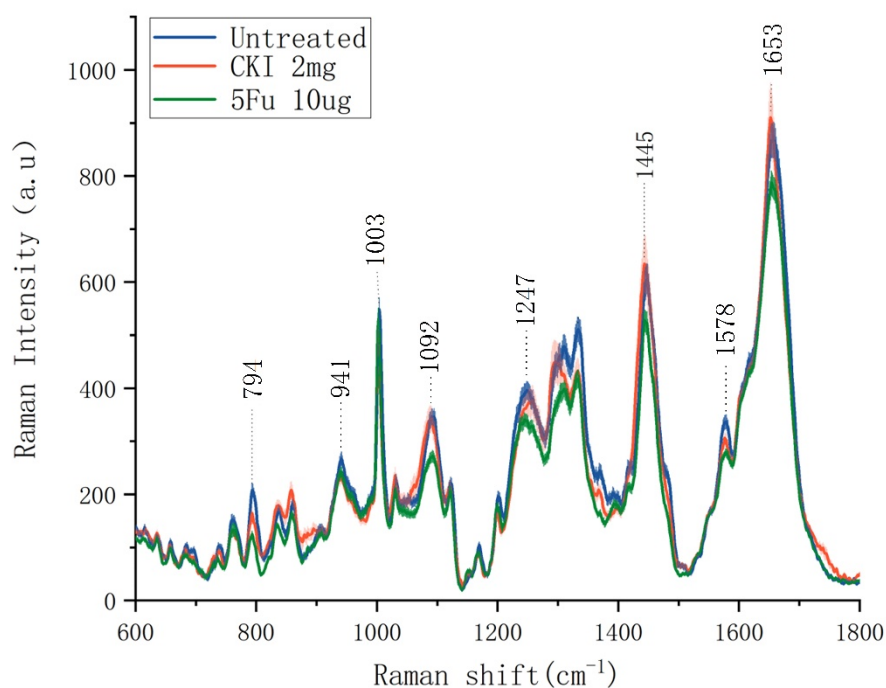

**Figure S1.** Raman spectrum from nucleus at 48h after drug action.

#### Reference

- [1] S. Konorov, M. Jardon, M. Piret, et al. Raman microspectroscopy of live cells under autophagy-inducing conditions. *Analyst*, 2012, **137**, 4662-4668.
- [2] Ho C S, Jean N, Hogan C A, et al. Rapid identification of pathogenic bacteria using Raman spectroscopy and deep learning. *Nat Commun*, 2019, **10**, 4927.
- [3] Carvalho L F, Bonnier F, O'Callaghan K, et al. Raman micro-spectroscopy for rapid screening of oral squamous cell carcinoma. *Exp Mol Pathol*, 2015, **98**, 502-9.
- [4] Brauchle E, Thude S, Brucker S Y, et al. Cell death stages in single apoptotic and necrotic cells monitored by Raman microspectroscopy. *Sci Rep*, 2014, **4**, 4698.
- [5] Rangan S, Kamal S, Konorov S O, et al. Types of cell death and apoptotic stages in Chinese Hamster Ovary cells distinguished by Raman spectroscopy. *Biotechnol Bioeng*, 2018, **115**, 401-412.
- [6] Eberhardt K, Beleites C, Marthandan S, et al. Raman and Infrared Spectroscopy Distinguishing Replicative Senescent from Proliferating Primary Human Fibroblast Cells by Detecting Spectral Differences Mainly Due to Biomolecular Alterations. *Analytical chemistry*, 2017, **89**, 2937-2947.
- [7] Liendl L, Grillari J, Schosserer M. Raman fingerprints as promising markers of cellular senescence and aging. *Gero Science*, 2019, **42**, 377-387.
- [8] Choi J S, Ilin Y, Kraft M L, et al. Tracing Hematopoietic Progenitor Cell Neutrophilic Differentiation via Raman Spectroscopy. *Bioconjug Chem*, 2018, **29**, 3121-8.
